# Supplementary material for: Engineered superparamagnetic iron oxide nanoparticles for ultra-enhanced uranium separation and sensing
Source: Royal Society of Chemistry journal article supplement (doi:10.1039/c6ta04709b), 2016-01-01
Supplement: c6ta04709b1.pdf [file c6ta04709b1.pdf]

1 [Supplementary Information]

# 2 **Engineered Superparamagnetic Iron Oxide**

# 3 **Nanoparticles for Ultra-Enhanced Uranium**

# 4 **Separation and Sensing**

5 Wenlu Li,<sup>a,#</sup> John T. Mayo,<sup>b,#</sup> Denise N. Benoit,<sup>b</sup> Lyndsay D. Troyer,<sup>c</sup> Zuzanna A. Lewicka,<sup>d</sup>

6 Brandon J. Lafferty,<sup>e</sup> Jeffrey G. Catalano,<sup>c</sup> Seung Soo Lee,<sup>a</sup> Vicki L. Colvin,<sup>f,\*</sup> and John D.

7 Fortner<sup>a,\*</sup>

8 <sup>a</sup> Department of Energy, Environmental, and Chemical Engineering,

9 Washington University in St. Louis, St. Louis, MO, 63130, USA

10 <sup>b</sup> Department of Chemistry, Rice University, Houston, TX, 77005, USA

11 <sup>c</sup> Department of Earth and Planetary Sciences,

12 Washington University in St. Louis, St. Louis, MO, 63130, USA

13 <sup>d</sup> Department of Electrical and Computer Engineering,

14 Rice University, Houston, TX, 77005, USA

15 <sup>e</sup> U.S. Army Corps of Engineers, Engineer Research and Development Center, Vicksburg, MS,

16 39180, USA

17 <sup>f</sup> Department of Chemistry, Brown University, Providence, RI, 02912, USA

18  
19 <sup>#</sup>These authors contributed equally to this work.

20  
21  
22 \*To whom correspondence should be addressed:

23 Vicki L. Colvin: T: +1-401-863-2321; F: +1-401-863-2594; Email: [vicki\\_colvin@brown.edu](mailto:vicki_colvin@brown.edu)

24 John D. Fortner: T: +1-314-935-9293; F: +1-314-935-5464; Email: [jfortner@wustl.edu](mailto:jfortner@wustl.edu)

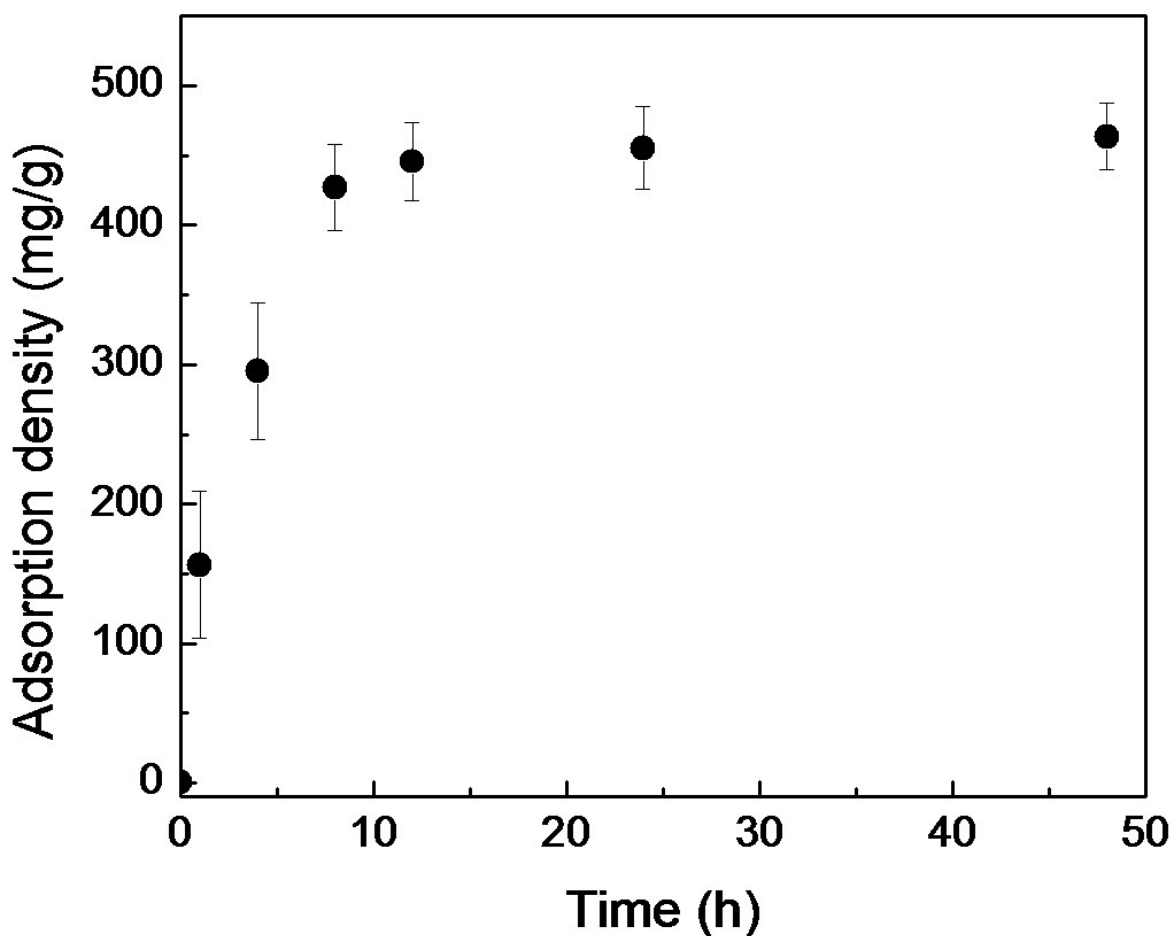

26

27 **Figure S1.** Uranium adsorption density for described engineered IONPs as a function of  
 28 equilibrium time for a typical uranium sorption experiment at pH 5.6. The concentration of Fe is  
 29 20 mg/L and the injected uranium concentration is 20 mg/L. The uranium adsorption density was  
 30 plotted as a function of time for up to 48 hours and all experiments were conducted in triplicate.  
 31 Results indicate the systems almost reach equilibrium after 8 hours and thus 24 hours is  
 32 sufficient for all systems to reach equilibrium.

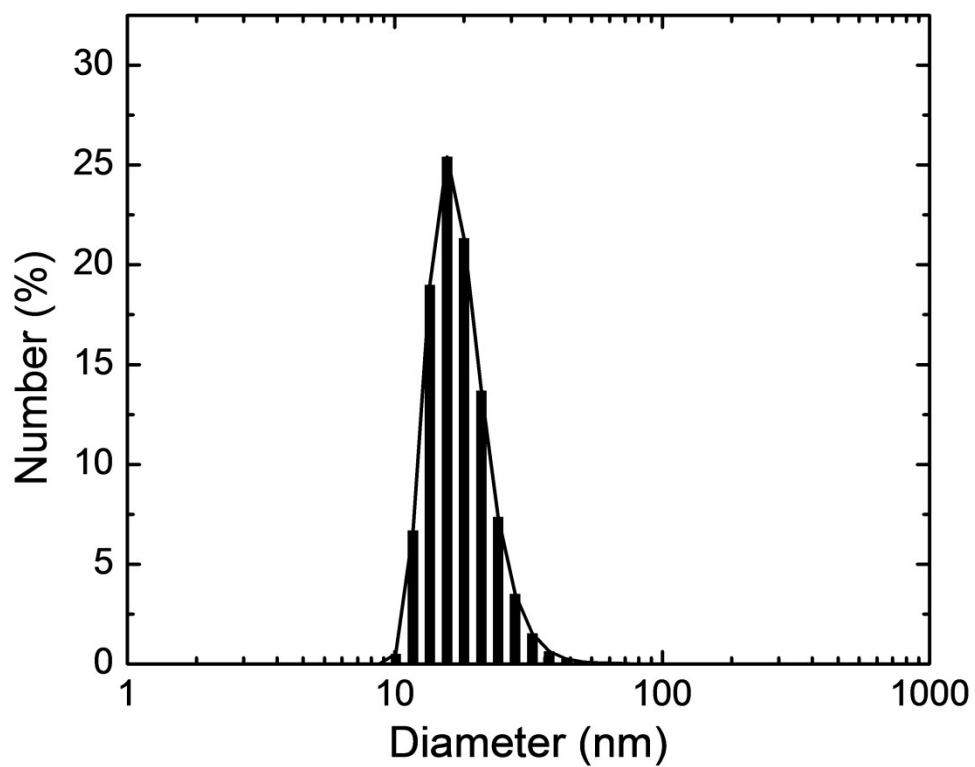

33

34 **Figure S2.** Hydrodynamic diameter of engineered IONPs measured by DLS. Number mean  
 35 average size distribution of oleic acid bilayer engineered IONPs in water.

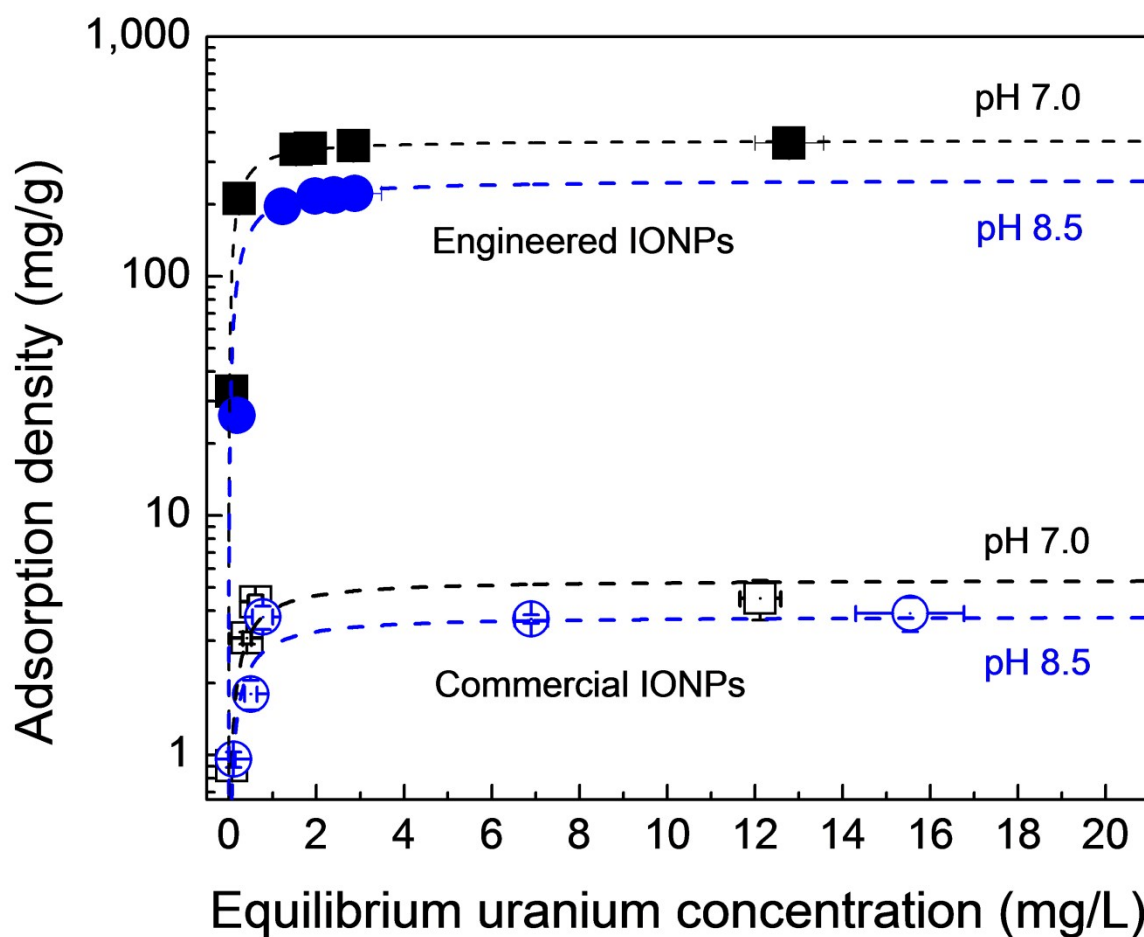

36

37 **Figure S3.** Effect of solution pH on uranium sorption isotherms for commercial and engineered  
 38 IONPs. pH dependent uranium sorption isotherms of commercial and engineered IONPs at pH  
 39 7.0 and pH 8.5. Dashed lines represent Langmuir modeling of the data.

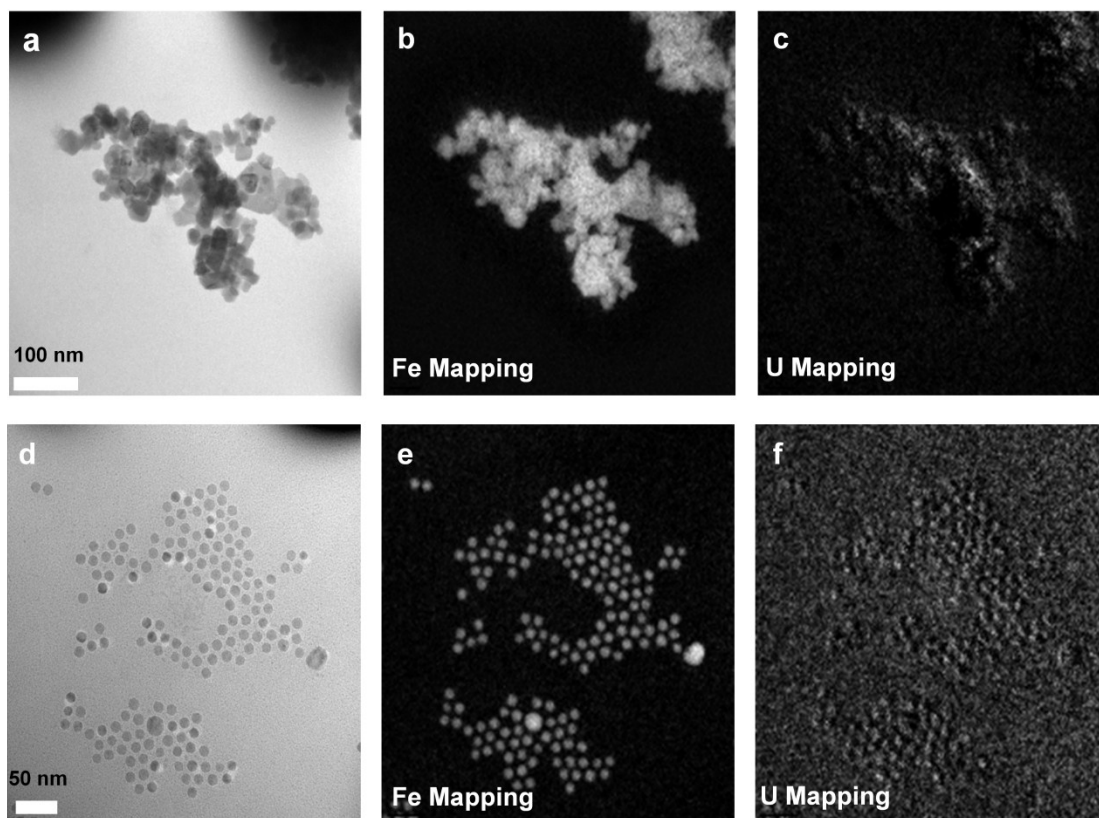

40

41 **Figure S4.** Images of IONPs before and after uranium exposure. (a) FEG-TEM image of the  
 42 commercial IONPs. (b) Fe mapping using GIF imaging on commercial IONPs. (c) U mapping  
 43 using GIF imaging on commercial IONPs. (d) FEG-TEM image of oleic acid bilayer stabilized  
 44 engineered IONPs. (e) Fe mapping using GIF imaging on oleic acid bilayer stabilized engineered  
 45 IONPs. (f) U mapping using GIF imaging on oleic acid bilayer stabilized engineered IONPs.

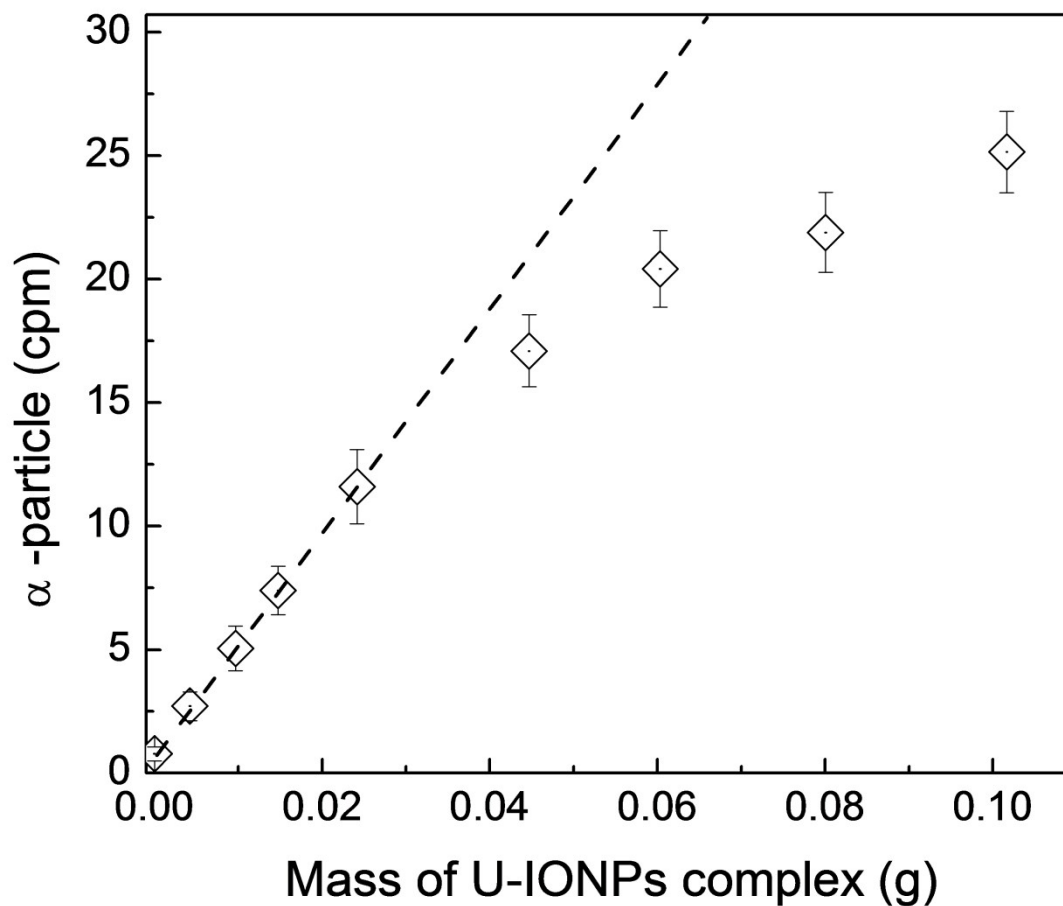

46

47 **Figure S5.** Commercial U-IONPs  $\alpha$ -particle detection analysis. This experiment was designed to  
 48 observe particle shielding. The U-IONPs concentrations were held at the set ratio but were added  
 49 at higher total mass to the film (i.e. thicker deposits). Thus  $\alpha$ -particle detection should increase  
 50 linearly, until  $\alpha$ -particle blocking is observed.

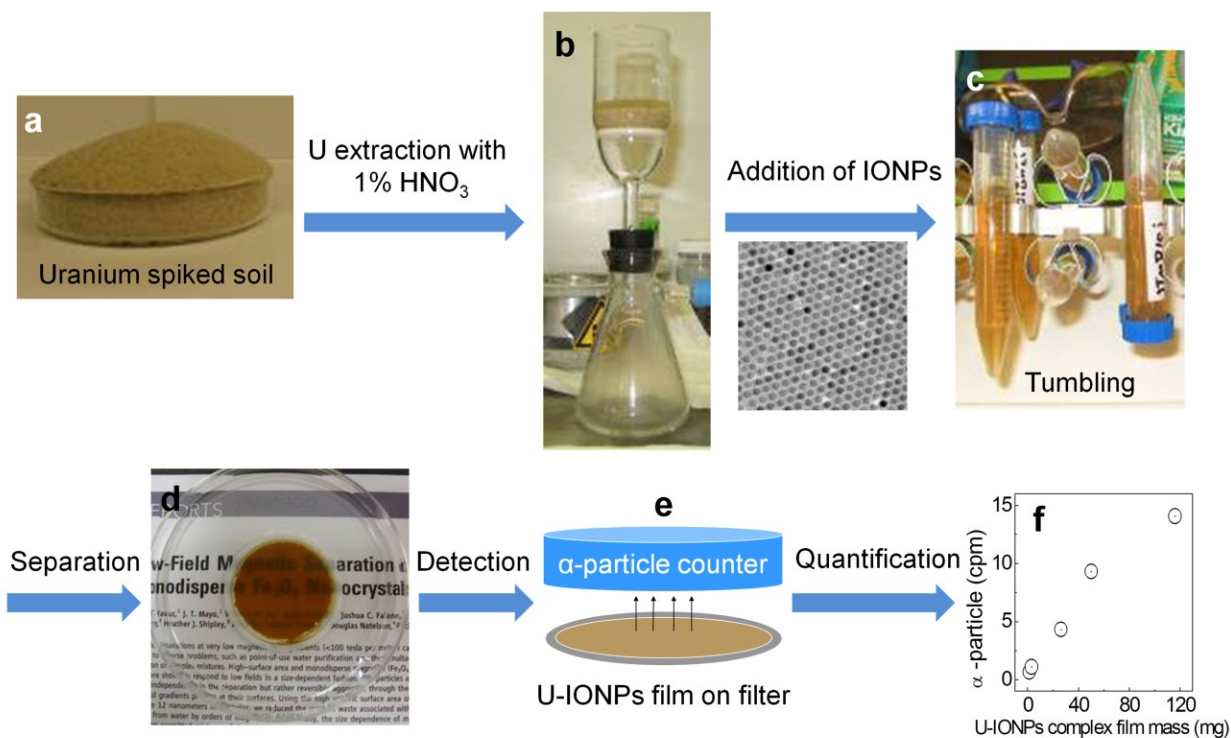

51

52 **Figure S6.** General process schematic. (a) Uranium laden soil (sand). (b) Soil extraction,  
 53 dissolving bound uranium. (c) Addition of IONPs suspension and equilibrating suspension  
 54 (uranium-IONPs sorption). (d) Resulting thin film formation. (e)  $\alpha$ -particle detection of uranium  
 55 via U-IONPs film. (f) Example of quantified  $\alpha$ -particle counts as a function of uranium loading  
 56 onto the film.

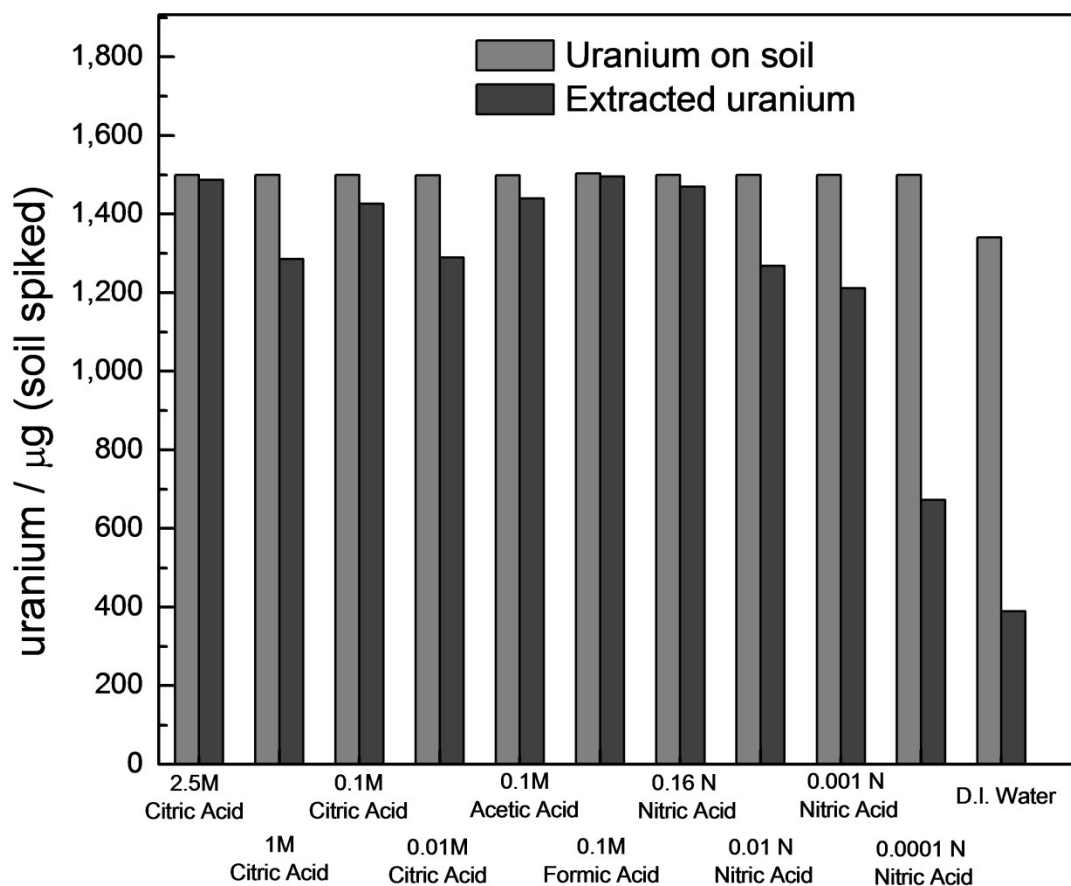

57

58 **Figure S7.** Soil extraction efficiencies for varying aqueous extraction solutions. Sample  
 59 preparation included washed sea sand (Fisher scientific) with uranium spiked as dissolved uranyl  
 60 nitrate stock which was allowed to dry under slight vacuum and then homogenized. Background  
 61 uranium soil concentration was determined to be  $150.7 \pm 5.6 \mu\text{g U/g sand}$  for all systems except  
 62 for the D.I. water extracted ( $134.1 \pm 3.2 \mu\text{g U/g sand}$ ). Uranium extraction efficiencies with  
 63 different aqueous chemistries resulting in higher extraction efficiencies (25 - 99 %). For each, 10  
 64 g of spiked sand was extracted with 20 mL total extractant solution (2 x 10 mL steps). All  
 65 systems were under oxic conditions.



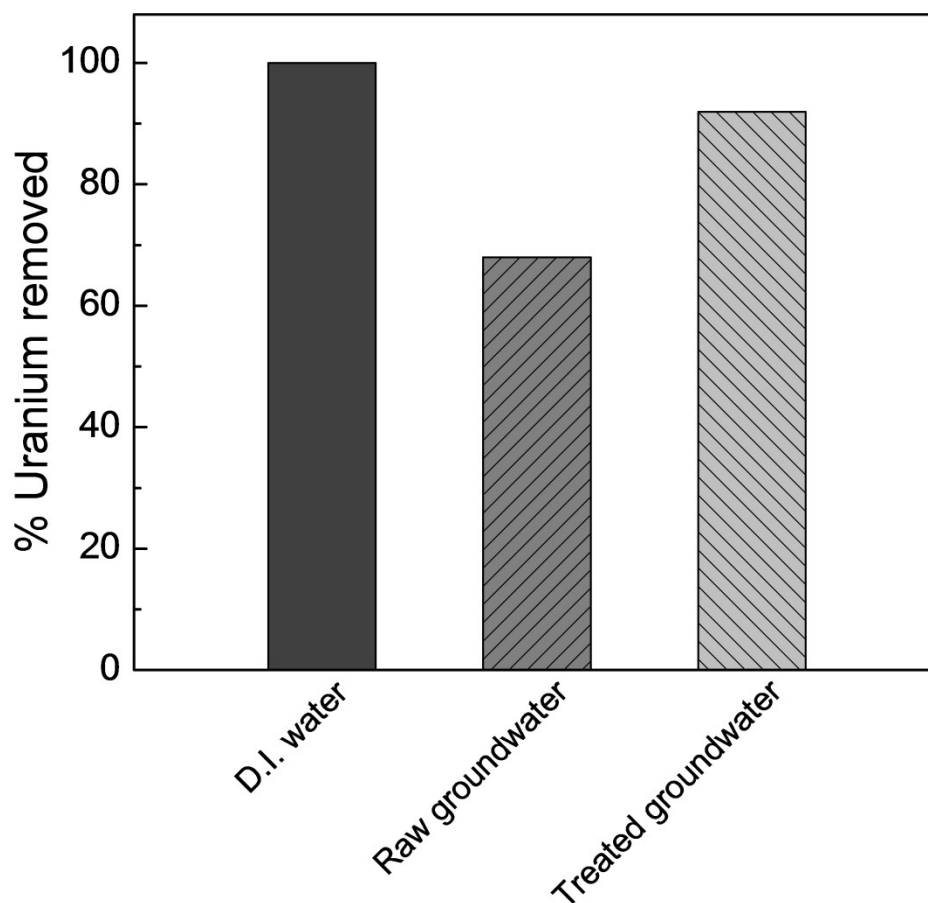

66

67 **Figure S8.** Interfering constituents: uranium sorbed in a complex media (groundwater) relatively  
 68 compared to D.I. water. Raw ground water was taken from a local well (at 500 ft below the  
 69 surface) and only filtered with 0.45  $\mu\text{m}$  PES filter to remove solids. Treated groundwater was  
 70 acidified at 1 % nitric acid and allowed to equilibrate with the atmosphere (removing  
 71 carbonates). Percent numbers are relative to D.I. water control, pH 5.5. Results indicate that  
 72 carbonate interactions retarded uranium sorption when untreated (68 % removal efficiency), but  
 73 when treated with acid effectively removing carbonates, uranium could effectively sorb to  
 74 available IONPs (92 %). For these studies a 100 ppb uranium solution was exposed to 1 mg/L  
 75 engineered IONPs.

76 **Table S1.** The maximum uranium sorption capacity ( $q_{max}$ ) and the sorption constant ( $k$ ) for  
 77 engineered and commercial IONPs derived by the Langmuir equation.

|                     | Engineered IONPs |       |       | Commercial IONPs |     |     |
|---------------------|------------------|-------|-------|------------------|-----|-----|
| pH                  | 5.6              | 7.0   | 8.5   | 5.6              | 7.0 | 8.5 |
| $q_{max}$<br>(mg/g) | 500.0            | 370.4 | 250.0 | 5.7              | 5.4 | 3.8 |
| $k$<br>(L/mg)       | 1.5              | 5.4   | 3.1   | 2.3              | 3.0 | 3.1 |

78

79 **Table S2.** Percent removal of IONPs using 0.02  $\mu\text{m}$  filtration or magnetic separation (0.35 T, 48  
80 hours).

| Material         | Separation   | % IONPs Removal | Separation | % IONPs Removal |
|------------------|--------------|-----------------|------------|-----------------|
| Commercial IONPs | 20 nm Filter | 99.9            | Magnetic   | 99.9            |
| Engineered IONPs | 20 nm Filter | 98.9            | Magnetic   | 93.3            |

81
